# Supplementary material for: Micro‐proteomics with iterative data analysis: Proteome analysis in C. elegans at the single worm level
Source: PubMed Central journal article supplement (PMC4819713; doi:10.1002/pmic.201500264), 2016-01-07

# PROTEOMICS

## Supporting Information for Proteomics

DOI 10.1002/pmic.201500264

Dalila Bensaddek, Vikram Narayan, Armel Nicolas, Alejandro Brenes Murillo,  
Anton Gartner, Cynthia J. Kenyon and Angus I. Lamond

**Micro-proteomics with iterative data analysis: Proteome analysis in *C. elegans*  
at the single worm level**

distribution of relative iBAQ values

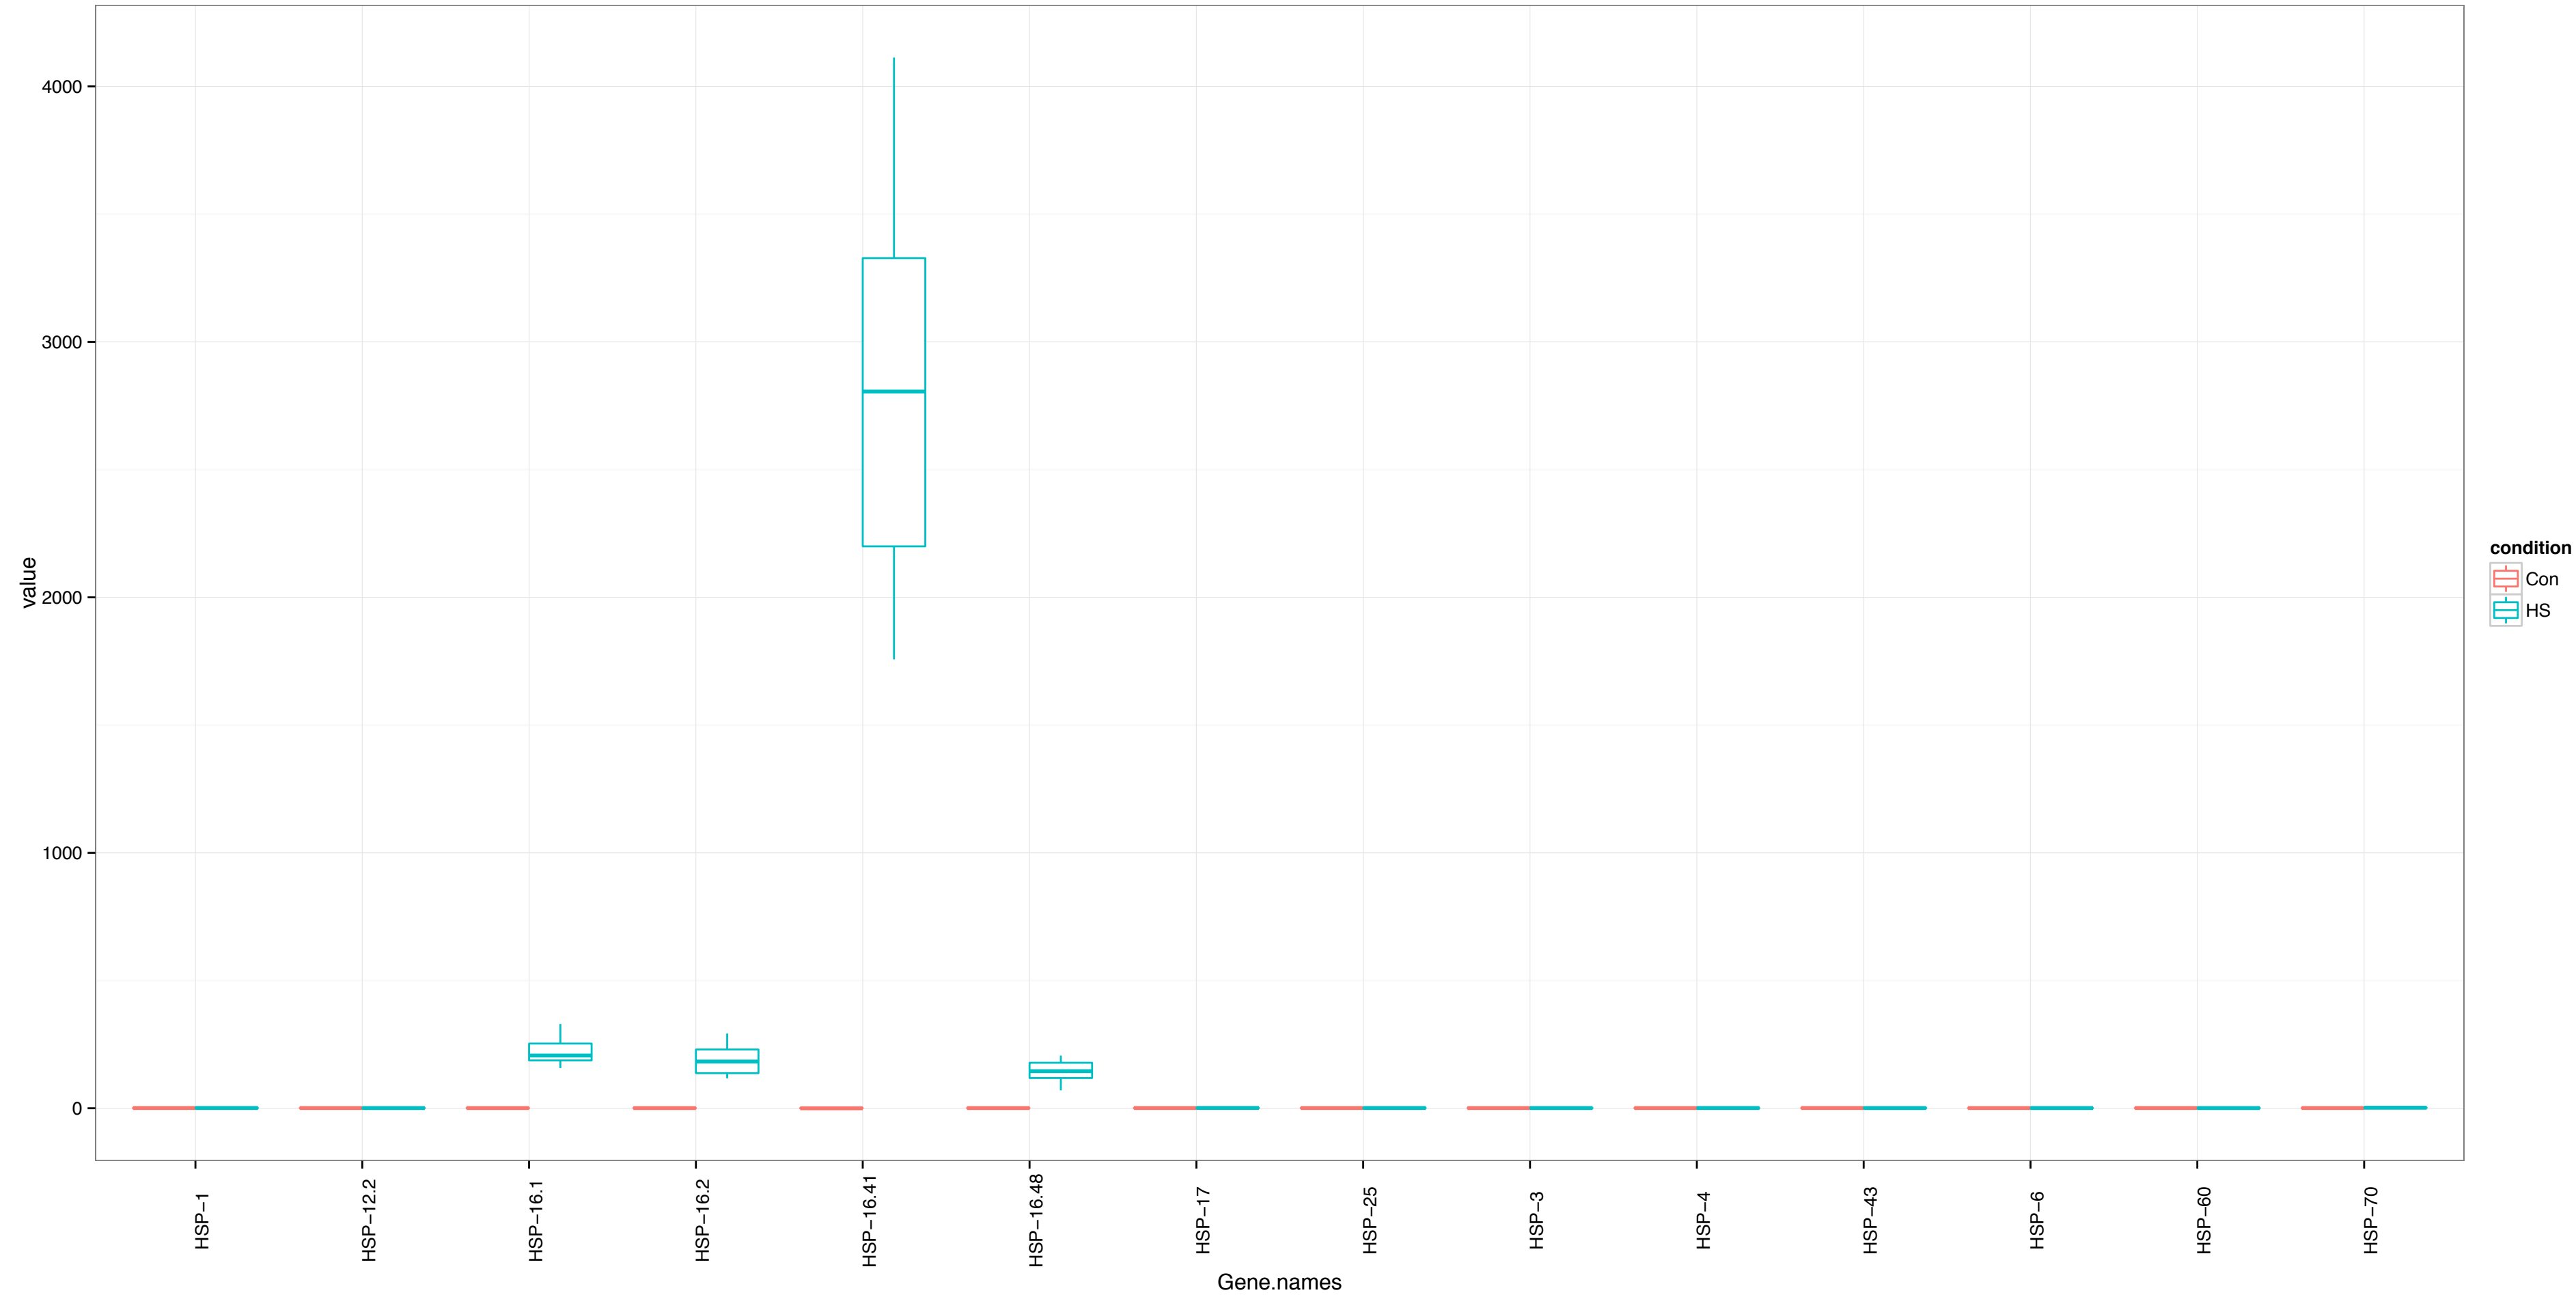

Supplement: PMIC-16-381-s004.pdf [file PMIC-16-381-s004.pdf]
